# Supplementary material
Source: PubMed Central journal article supplement (PMC4882279)
Supplement: NIHMS741182-supplement-03.pdf [file NIHMS741182-supplement-03.pdf]

to transverse cut section of prostate. (C,D) Extra capsular extension of carcinoma, arrows point to region of ECE in background of striated pattern capsule marked by \* with corresponding H&E at 50x magnification (E, F) Lobular structure of benign prostatic glands. (G, H) Corpora amylacea within glands. (I, J) Prostate cancer glands with a Gleason 3+3 pattern. Corresponding H&E for F, H and J at 100X magnification. (K) Panoramic image of normal prostate generated with a mosaicing algorithm that increased the field of view by approximately 4-fold.

**Figure S1 – Hematoxylin and eosin (H&E) and S100 immunohistochemistry of neurovascular bundle.** In a patient who did not have a nerve-sparing procedure, the presence of nerves in the bundle was demonstrated by (A) standard H&E (100X magnification) and (B) immunohistochemical staining for S100 (100X magnification).

## **SUPPLEMENTARY MOVIE LEGENDS**

**Video S1:** Representative view from within the robotic console showing intraoperative confocal endomicroscopy of left neurovascular bundle after nerve-sparing prostatectomy.. Dynamic imaging of the intact neurovascular bundle demonstrated dark globular adipocytes, thin dark nerve fibers, and adjacent blood vessel with flowing erythrocytes comes into view.
